# Supplementary material for: Antibiotic tolerance and persistence have distinct fitness trade-offs
Source: PubMed Central journal article supplement (PMC9704765; doi:10.1371/journal.ppat.1010963), 2022-11-14

# S4 Fig

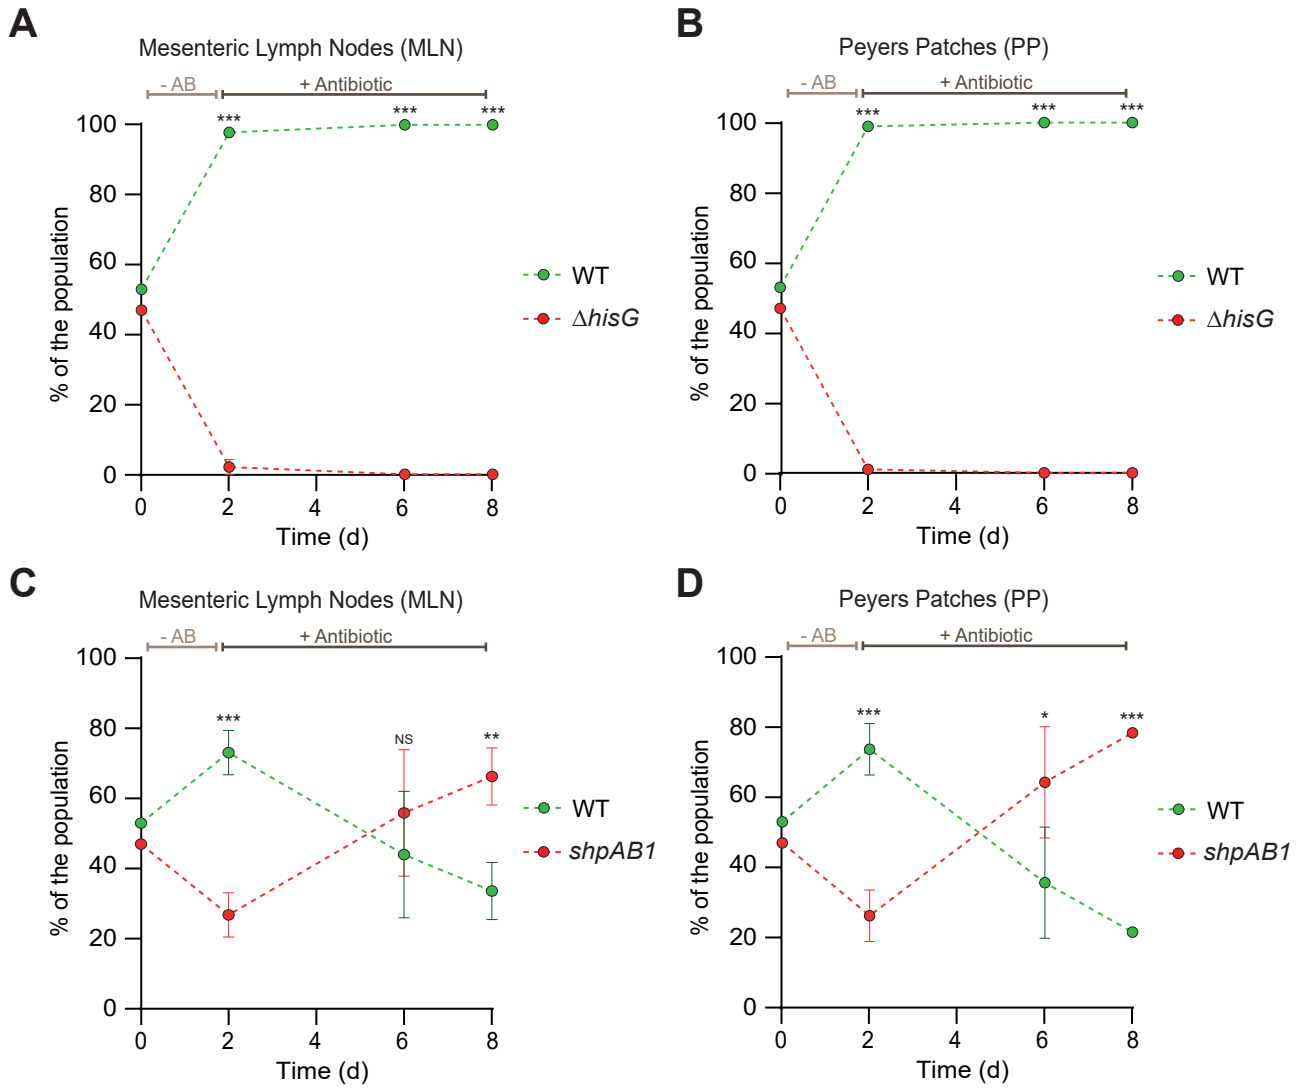

Supplement: ppat.1010963.s004.pdf [file ppat.1010963.s004.pdf]
