# Supplementary material for: Antibiotic tolerance and persistence have distinct fitness trade-offs
Source: PLOS journal article supplement (doi:10.1371/journal.ppat.1010963), 2022-11-14

# S1 Fig

**A**

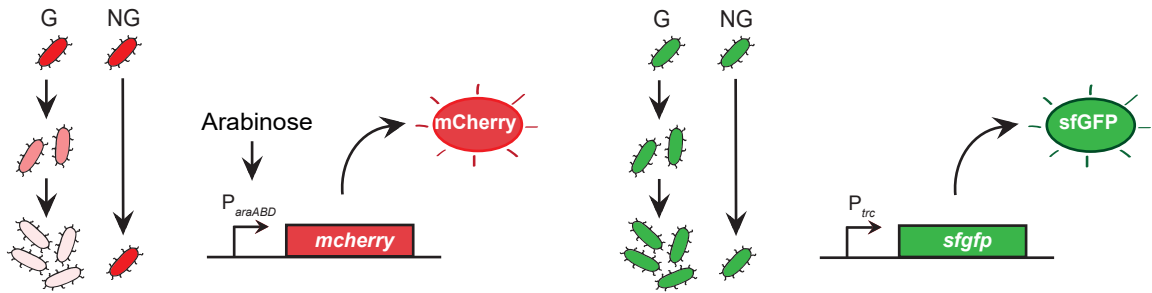

**B**

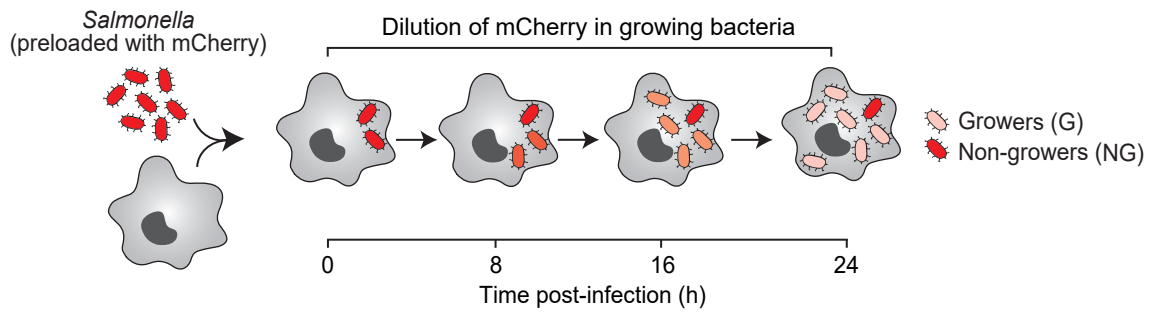

**C**

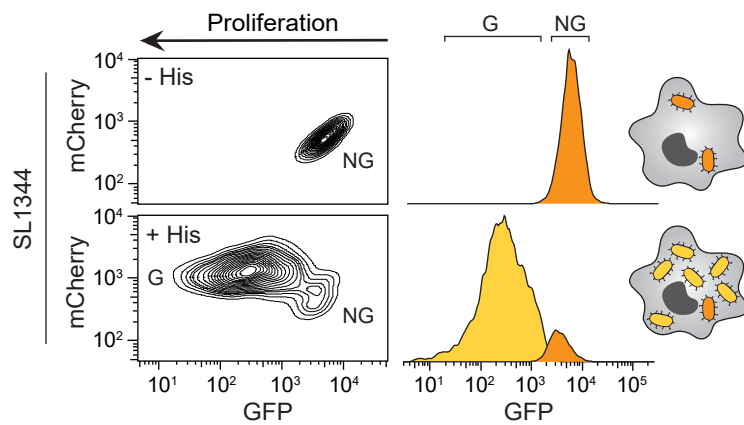

**D**

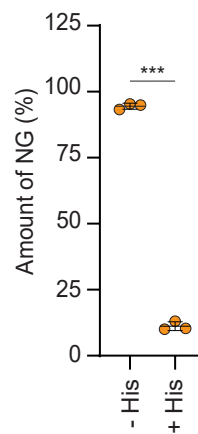

Supplement: S1 (10.1371/journal.ppat.1010963.s001) [file journal.ppat.1010963.s001]
